# Supplementary material for: The relationship between health literacy and self-care in persons with chronic diseases: a multicenter cross-sectional study
Source: Research Square preprint supplement (doi:10.21203/rs.3.rs-7573055/v1), 2025-10-27
Supplement: Supplementary file 1 [file 0762b89fee2fb2b3b1e21b07.docx]

| **Table 1:**  **Baseline characteristics study population (N=536)** | | | |
| --- | --- | --- | --- |
| **Self-care** | | **Mean** | **SD** |
|  | Maintenance | 70.4 | 14.7 |
|  | Monitoring | 69.9 | 22.3 |
|  | Management | 70.9 | 19.7 |
|  | Self-care Self-efficacy | 72.1 | 16.7 |
| **Type of chronic conditiona** | | **n** | **(%)** |
|  | Lung disease | 213 | 40 |
|  | Heart disease | 180 | 34 |
|  | Hypertension | 175 | 33 |
|  | Diabetes | 139 | 26 |
|  | Hypercholesterolemia | 93 | 17 |
|  | Cancer | 81 | 15 |
|  | Kidney disease | 73 | 14 |
|  | Rheumatism | 67 | 13 |
|  | Neurological disease | 49 | 9 |
|  | Chronic backpain | 38 | 7 |
|  | Bowel disease | 28 | 5 |
|  | Skin disease | 26 | 5 |
|  | Blood disease | 22 | 4 |
|  | Transplantation | 18 | 3 |
|  | Eye disease | 18 | 3 |
|  | Stomach disease | 12 | 2 |
|  | Depression | 12 | 2 |
|  | Liver disease | 7 | 1 |
|  | Otherb | 62 | 12 |
| aParticipants were allowed to select multiple conditions  bSuch as: adrenal cortex insufficiency, aneurysm, anxiety disorder, celiac disease, dystrophy, endometriosis, gout, prostate problems, thyroid disease, tuberculosis, Turner’s syndrome, vascular disease, | | | |
