# Supplementary material for: The relationship between health literacy and self-care in persons with chronic diseases: a multicenter cross-sectional study
Source: Research Square preprint supplement (doi:10.21203/rs.3.rs-7573055/v1), 2025-10-27
Supplement: Supplementary file 2 [file 1fae884c1f328aae0ce23009.docx]

| **Table 6: Regression model of health literacy and self-care management (enter method) (N=536)** | | | | | | | | | | | | | | |
| --- | --- | --- | --- | --- | --- | --- | --- | --- | --- | --- | --- | --- | --- | --- |
|  | | | **Model 1 (Block 1)** | | | **Model 2 (Block 1,2)** | | | **Model 3 (Block 1,2,3)** | | | **Model 4 (Block 1,2,3,4)** | | |
| **β** | **95% CI** | ***R*2** | **β** | **95% CI** | ***R*2** | **β** | **95% CI** | ***R*2** | **β** | **95% CI** | ***R*2 (*P*)** |
| Block 1 | | |  |  | **0.02a** |  |  | **0.03a** |  |  | **0.04a** |  |  | **0.13a** |
|  | Health literacy | | **6.40a** | 3.09 - 9.71 |  | **5.68a** | 2.30 - 9.06 |  | **5.51a** | 2.10 – 8.93 |  | 0.25 | -3.26 - 3.75 |  |
| Block 2 | | |  |  |  |  |  |  |  |  |  |  |  |  |
|  | Age | |  |  |  | **-0.12b** | -0.25 - 0.01 |  | -0.11 | -0.23 - 0.02 |  | -0.08 | -0.20 - 0.04 |  |
|  | Gender (female) | |  |  |  | -0.26 | -3.59 - 3.07 |  | 0.59 | -2.80 - 3.99 |  | 1.61 | -1.62 - 4.84 |  |
| Block 3 | | |  |  |  |  |  |  |  |  |  |  |  |  |
|  | Number of chronic  Conditions | |  |  |  |  |  |  | **1.13b** | 0.04 - 2.22 |  | **1.26b** | 0.23 - 2.30 |  |
|  | Educational level | |  |  |  |  |  |  |  |  |  |  |  |  |
|  |  | Sec. education |  |  |  |  |  |  | 2.74 | -3.20 - 8.67 |  | 1.07 | -4.58 - 6.71 |  |
|  |  | Vocational |  |  |  |  |  |  | 3.55 | -2.41 - 9.51 |  | 1.99 | -3.68 - 7.66 |  |
|  |  | University |  |  |  |  |  |  | 5.80 | -0.57 - 12.17 |  | 4.18 | -1.88 - 10.24 |  |
|  | Living situation | |  |  |  |  |  |  | 2.72 | -0.90 - 6.33 |  | 2.27 | -1.17 - 5.70 |  |
| Block 4 | | |  |  |  |  |  |  |  |  |  |  |  |  |
|  | Self-efficacy | |  |  |  |  |  |  |  |  |  | **0.51a** | 0.30 - 0.51 |  |
| *R*2 indicates adjusted *R*2. β=standardized beta coefficient. CI=Confidence interval. aStatistically significant at P < 0.001. bStatistically significant at P < 0.05. | | | | | | | | | | | | | | |
