# Supplementary material for: The relationship between health literacy and self-care in persons with chronic diseases: a multicenter cross-sectional study
Source: Research Square preprint supplement (doi:10.21203/rs.3.rs-7573055/v1), 2025-10-27
Supplement: Supplementary file 3 [file 31889c0e6ae855f89ced03c6.docx]

| **Table 3: Correlation matrix (N=536)** | | | | | | | | | |
| --- | --- | --- | --- | --- | --- | --- | --- | --- | --- |
| **Variable** | | **Mean**  **± SD** | **1**  ***r*pb (*P*)** | **2**  ***r* (*P*)** | **3**  ***r* (*P*)** | **4**  ***r* (*P*)** | **5**  ***r* (*P*)** | **6**  ***r* (*P*)** | **7**  ***r* (*P*)** |
| 1. | Health literacy |  | 1 |  |  |  |  |  |  |
| 2. | Age | 66.7 (±14.0) | -0.21  (**<0.001**) | 1 |  |  |  |  |  |
| 3. | Chronic conditions | 2.5  (±1.6) | -0.10  (**0.027**) | 0.21  (**<0.001**) | 1 |  |  |  |  |
| 4. | Self-care maintenance | 70.4 (±14.7) | 0.20  (**<0.001**) | -0.00  (0.99) | 0.02  (0.58) | 1 |  |  |  |
| 5. | Self-care  monitoring | 69.9 (±22.3) | 0.23  (**<0.001**) | -0.13  (**0.003**) | -0.14  (0.75) | 0.37  (**<0.001**) | 1 |  |  |
| 6. | Self-care management | 70.9 (±19.7) | 0.16  (**<0.001**) | -0.12  (**0.007**) | 0.04  (0.36) | 0.35  (**<0.001**) | 0.36  (**<0.001**) | 1 |  |
| 7. | Self-efficacy | 72.1 (±16.7) | 0.41  (**<0.001**) | -0.15  (**<0.001**) | -0.09  (0.04) | 0.43  (**<0.001**) | 0.40  (**<0.001**) | 0.36  (**<0.001**) | 1 |
| *r =* Pearson’s correlation; *r*pb = Point-biserial correlation; | | | | | | | | | |
