# Supplementary material for: The relationship between health literacy and self-care in persons with chronic diseases: a multicenter cross-sectional study
Source: Research Square preprint supplement (doi:10.21203/rs.3.rs-7573055/v1), 2025-10-27
Supplement: Supplementary file 4 [file 74ebe298d06bce6045cb26fd.docx]

| **Table 4: Regression model of health literacy and self-care maintenance (enter method) (N=536)** | | | | | | | | | | | | | | |
| --- | --- | --- | --- | --- | --- | --- | --- | --- | --- | --- | --- | --- | --- | --- |
|  | | | **Model 1 (Block 1)** | | | **Model 2 (Block 1,2)** | | | **Model 3 (Block 1,2,3)** | | | **Model 4 (Block 1,2,3,4)** | | |
| **β** | **95% CI** | ***R*2** | **β** | **95% CI** | ***R*2** | **β** | **95% CI** | ***R*2** | **β** | **95% CI** | ***R*2 (*P*)** |
| Block 1 | | |  |  | **0.04a** |  |  | **0.04a** |  |  | **0.07a** |  |  | **0.21a** |
|  | Health literacy | | **5.98a** | 3.53 - 8.44 |  | **6.24a** | 3.73 - 8.75 |  | **5.61a** | 3.10 - 8.12 |  | 0.89 | -1.62 - 3.40 |  |
| Block 2 | | |  |  |  |  |  |  |  |  |  |  |  |  |
|  | Age | |  |  |  | 0.44 | -0.47 - 0.13 |  | 0.08 | -0.02 - 0.17 |  | **0.10b** | 0.01 - 0.19 |  |
|  | Gender (female) | |  |  |  | -0.45 | -2.93 - 2.03 |  | 0.33 | -2.16 - 2.83 |  | 1.24 | -1.06 - 3.55 |  |
| Block 3 | | |  |  |  |  |  |  |  |  |  |  |  |  |
|  | Number of chronic  Conditions | |  |  |  |  |  |  | 0.54 | -0.27 - 1.34 |  | 0.66 | -0.09 - 1.40 |  |
|  | Educational level | |  |  |  |  |  |  |  |  |  |  |  |  |
|  |  | Sec. education |  |  |  |  |  |  | **5.78b** | 1.42 - 10.14 |  | **4.29b** | 0.25 - 8.31 |  |
|  |  | Vocational |  |  |  |  |  |  | **5.19b** | 0.81 - 9.57 |  | 3.80 | -0.26 - 7.84 |  |
|  |  | University |  |  |  |  |  |  | **9.55a** | 4.87 - 14.23 |  | **8.10a** | 3.77 - 12.42 |  |
|  | Living situation | |  |  |  |  |  |  | 1.90 | -0.76 - 4.56 |  | 1.50 | -0.96 - 3.95 |  |
| Block 4 | | |  |  |  |  |  |  |  |  |  |  |  |  |
|  | Self-efficacy | |  |  |  |  |  |  |  |  |  | **0.37a** | 0.29 - 0.44 |  |
| *R*2 indicates adjusted *R*2. β=standardized beta coefficient. CI=Confidence interval. aStatistically significant at P < 0.001. bStatistically significant at P < 0.05. | | | | | | | | | | | | | | |
