# Supplementary material for: The relationship between health literacy and self-care in persons with chronic diseases: a multicenter cross-sectional study
Source: Research Square preprint supplement (doi:10.21203/rs.3.rs-7573055/v1), 2025-10-27
Supplement: Supplementary file 5 [file 7ec24ca909edeb69e94c5911.docx]

| **Table 5: Regression model of health literacy and self-care monitoring (enter method) (N=536)** | | | | | | | | | | | | | | |
| --- | --- | --- | --- | --- | --- | --- | --- | --- | --- | --- | --- | --- | --- | --- |
|  | | | **Model 1 (Block 1)** | | | **Model 2 (Block 1,2)** | | | **Model 3 (Block 1,2,3)** | | | **Model 4 (Block 1,2,3,4)** | | |
| **β** | **95% CI** | ***R*2** | **β** | **95% CI** | ***R*2** | **β** | **95% CI** | ***R*2** | **β** | **95% CI** | ***R*2 (*P*)** |
| Block 1 | | |  |  | **0.05a** |  |  | **0.06a** |  |  | **0.07a** |  |  | **0.18a** |
|  | Health literacy | | **10.08a** | 6.38 - 13.77 |  | **9.36a** | 5.61 - 13.11 |  | **8.74a** | 4.96 – 12.53 |  | 2.30 | -1.54 - 6.14 |  |
| Block 2 | | |  |  |  |  |  |  |  |  |  |  |  |  |
|  | Age | |  |  |  | -0.19 | -0.25 - 0.02 |  | -0.09 | -0.23 - 0.06 |  | -0.06 | -0.19 - 0.08 |  |
|  | Gender (female) | |  |  |  | **4.51b** | 0.75 - 8.15 |  | **5.14a** | 1.38 - 8.91 |  | **6.38a** | 2.85 - 9.92 |  |
| Block 3 | | |  |  |  |  |  |  |  |  |  |  |  |  |
|  | Number of chronic  Conditions | |  |  |  |  |  |  | 0.60 | -0.61 - 1.81 |  | 0.76 | -0.37 - 1.90 |  |
|  | Educational level | |  |  |  |  |  |  |  |  |  |  |  |  |
|  |  | Sec. education |  |  |  |  |  |  | **7.83b** | 1.26 - 14.41 |  | 5.79 | -0.39 - 11.97 |  |
|  |  | Vocational |  |  |  |  |  |  | **8.14b** | 1.53 - 14.75 |  | **6.24b** | 0.04 - 12.45 |  |
|  |  | University |  |  |  |  |  |  | **10.44b** | 3.38 - 17.51 |  | **8.46b** | 1.83 - 15.10 |  |
|  | Living situation | |  |  |  |  |  |  | 0.92 | -3.10 - 4.92 |  | 0.37 | -3.39 - 4.12 |  |
| Block 4 | | |  |  |  |  |  |  |  |  |  |  |  |  |
|  | Self-efficacy | |  |  |  |  |  |  |  |  |  | **0.50a** | 0.38 - 0.61 |  |
| *R*2 indicates adjusted *R*2. β=standardized beta coefficient. CI=Confidence interval. aStatistically significant at P < 0.001. bStatistically significant at P < 0.05. | | | | | | | | | | | | | | |
