# Supplementary material for: The relationship between health literacy and self-care in persons with chronic diseases: a multicenter cross-sectional study
Source: Research Square preprint supplement (doi:10.21203/rs.3.rs-7573055/v1), 2025-10-27
Supplement: Supplementary file 6 [file 9d4436c05c68190991e344a7.docx]

| **Table 2: Outcomes self-care and self-efficacy scales (N=536)** | | | | | | | | |  | |
| --- | --- | --- | --- | --- | --- | --- | --- | --- | --- | --- |
|  | | **Total** | **Self-care**  **Maintenance** | | **Self-care**  **Monitoring** | | **Self-care**  **Management** | | **Self-efficacy** | |
| N (%) | Mean (SD) | p | Mean (SD) | p | Mean (SD) | p | Mean (SD) | p |
| **Health literacy** | |  |  |  |  |  |  |  |  | |
|  | Adequate | 289 (54) | 73.2 (14.7) | **<0.001a** | 74.5 (21.4) | **<0.001a** | 73.8 (19.5) | **<0.001a** | 78.5 (13.8) | **<0.001a** |
|  | Inadequate | 247 (46) | 67.2 (14.1) | 64.4 (21.4) | 67.4 (19.4) | 64.7 (16.8) |
| **Gender** | |  |  |  |  |  |  |  |  | |
|  | Female | 247 (46) | 70.7 (14.3) | 0.66a | 72.5 (20.1) | 0.11a | 71.0 (19.0) | 0.90a | 70.8 (17.5) | 0.09a |
| **Age (years)** | |  |  |  |  |  |  |  |  | |
|  | 18-64 | 195 (37) | 70.7 (14.7) | 0.76b | 72.1 (20.3) | 0.08b | 74.2 (17.4) | **0.003b** | 74.7 (13.9) | |
|  | ≥65 | 339 (63) | 70.3 (14.7) | 68.6 (23.2) | 68.9 (20.7) | 70.1 (18.0) | **0.008b** |
| **Educational level** | |  |  |  |  |  |  |  |  | |
|  | Primary education | 56 (10) | 64.2 (15.5) | **<0.001c** | 60.5 (25.0) | **0.003b** | 66.1 (19.1) | 0.054b | 65.1 (20.9) |  |
|  | Secondary education | 173 (32) | 70.4 (13.6) | 70.0 (21.0) | 70.0 (20.6) | 72.3 (16.6) |  |
|  | Vocational | 183 (34) | 69.4 (15.9) | 69.9 (22.3) | 70.7 (20.0) | 72.3 (16.0) | **0.022c** |
|  | UASd or University | 124 (23) | 74.7 (12.9) | 73.8 (21.7) | 74.4 (17.8) | 74.7 (15.0) |  |
| **Living situatione** | |  |  |  |  |  |  |  |  | |
|  | Alone | 184 (35) | 69.3 (14.3) | 0.19a | 69.5 (21.8) | 0.71a | 68.6 (21.6) | 0.06a | 70.7 (16.6) |  |
|  | Co-habiting | 348 (65) | 71.1 (14.9) | 70.2 (22.6) | 72.0 (18.8) | 73.0 (16.7) | 0.14a |
| **Number of chronic conditions** | |  |  |  |  |  |  |  |  | |
|  | One | 158 (29) | 69.6 (15.8) | 0.69b | 71.6 (20.4) | 0.56b | 69.9 (20.3) | 0.89b | 74.2 (16.1) |  |
|  | Two | 176 (33) | 71.5 (14.0) | 69.6 (23.1) | 70.8 (20.7) | 72.9 (17.7) |  |
|  | Three | 87 (16) | 70.1 (15.2) | 67.4 (23.4) | 71.5 (18.3) | 69.7 (16.5) | 0.08b |
|  | Four or more | 115 (21) | 70.1 (13.9) | 69.9 (22.6) | 71.7 (18.5) | 69.9 (15.8) |  |
| aIndependentT test  b Oneway Anova cWelch test dUAS=University of Applied Sciences emissing n=4 | | | | | | | | |  | |
